# Supplementary material
Source: publisher site journal article supplement (https://www.dovepress.com/article/408722)
Supplement: Supplementary file 1 [file get_supplementary_file.php]

Supplementary Material

# Supplemental material and methods

**Baseline examination**

Anthropometric measurements were taken by trained nurses. Data for height and weight were acquired following a protocol standardized to an accuracy of 0.1 kg and 0.1 cm, respectively. During the measurements, participants were asked to wear light clothing, no hats, and no shoes. Smoking habits were categorized as never, and current. Current smokers were defined as having smoked 100 cigarettes in their lifetime and currently smoking, former smokers as having smoked at least 100 cigarettes in their lifetime but who had quit smoking in the last 28 days. Alcohol consumption was evaluated with questions regarding the types of alcoholic beverages, the frequency of alcohol consumption per week and the usual amount consumed per occasion. Subjects who reported alcohol consumption >140 g/week for men and >70 g/week for women were deemed to have excessive alcohol consumption (1). Baseline blood pressure was measured using a mercury sphygmomanometer after the patient had rested quietly for at least 10 minutes, and the average of multiple measurements was taken as the systolic and diastolic blood pressure values.

**Assessment of NAFLD**

NAFLD was diagnosed by abdominal ultrasonography. Each participant's abdominal ultrasonography was performed by experienced radiologists using a B-mode topographical ultrasound system with a 3.5 MHz probe (Acuson X300, Siemens, Munich, Germany). Images were captured in a standard fashion with the patient in the supine position with the right arm raised above the head. The echocardiography examinations were performed by one experienced sonographer, and the data were analyzed by echocardiography experts who were blinded to all other results. Except for individuals with significant alcohol consumption, subjects were diagnosed with NAFLD by ultrasonography if at least two of the following three ultrasonic characteristics were positive: bright liver, liver echo greater than kidney, vascular blurring, and deep attenuation of ultrasound signal (2).

**Statistical analysis**

PAC in baseline characteristics was separated into three groups: ≤ 11.55, 11.56-16.39, and ≥ 16.40 ng/dL. We used the chi-square test, one-way analysis of variance, or Kruskal–Wallis test to compare the baseline characteristics of subgroups across PAC tertiles. Continuous variables are presented as mean ± standard deviation (SD) or median with interfertile range, and categorical variables are described as numbers or percentages. And chi-square test was used for categorical variables, one-way analysis of variance for linear trend, and the Kruskal–Wallis test was performed for continuous variables with normal and skewed distributions across tertiles of PAC, respectively.

Kaplan-Meier survival analysis was carried out using log-rank tests. Diagnostic checks on multicollinearity were done by calculating the variance inflation factors of all independent variables; all variables had variance inflation factor values of less than 10, indicating that they were not too closely correlated (Table S1). Cox regression analysis was used to estimate the hazard ratios (HRs) and 95% confidence intervals (CIs) for univariable and multivariable models. PAC was described as a continuous variable [per 1 and 5 ng/dL increase] and a categorical variable (tertiles) and was placed into different models. In addition to a crude model, three multivariable-adjusted models were carried out. In multivariable-adjusted models, besides the crude model, model 1 adjusted for age and sex. Model 2 adjusted for the variables in Model 1 plus body mass index (BMI), current smoker, systolic blood pressure (SBP); diastolic blood pressure (DBP), diabetes, primary aldosteronism (PA), TG, TC, HDL-c, LDL-C, GGT, ALT, AST, BUN, Cr, UA, and FPG. Model 3 adjusted for the variables in Model 2 plus lipid-lowering drugs, insulin, oral antidiabetic agents, β-blockers, calcium channel blockers (CCB), antiplatelet agents, angiotensin-converting enzyme inhibitors (ACEI), angiotensin receptor blocker (ARB) and spironolactone. A linear trend test was conducted by assigning medians to each tertile as a continuous variable in the models. We used a generalized additive model (GAM) to identify the non-linear relationship. If the non-linear relationship was observed, a two-piecewise linear regression model was conducted to calculate the threshold effect in terms of the smoothing plot, and the recursive method calculates automatically the inflection point, where the maximum model likelihood would be used. Heterogeneity across subgroups was assessed by cox regression analysis and is presented in forest plots, and interactions between subgroups and PAC were examined by likelihood ratio testing.

Lastly, to address potential unmeasured confounding, we calculated site-specific E-values. E-values estimate the minimum strength of association that an unmeasured confounder would need to have with both the exposure and outcome to fully explain away the observed association.

All analyses were computed with R software, version 4.1.1, at a 2-sided, 5% α level of significance.

# Supplementary Figures and Tables

## Supplementary Tables

**Table S1.** The variance inflation factor (VIF) of all preliminary variables in the ordinary least squares (OLS) model.

|  | VIF |
| --- | --- |
| PAC | 1.3 |
| Sex | 1.0 |
| Age | 1.2 |
| Lipid-lowering drugs | 1.2 |
| Antiplatelet agents | 1.2 |
| β-blockers | 1.2 |
| CCB | 1.2 |
| ACEI/ARB | 1.2 |
| Spironolactone | 1.1 |
| Insulin | 1.2 |
| Oral antidiabetic agents | 1.2 |
| Diabetes | 1.0 |
| PA | 1.0 |
| Smoking | 1.0 |
| DBP | 1.6 |
| SBP | 1.6 |
| BMI | 1.3 |
| ALT | 2.1 |
| AST | 1.9 |
| GGT | 1.2 |
| Cr | 1.4 |
| BUN | 1.0 |
| UA | 1.5 |
| TC | 9.5 |
| TG | 3.0 |
| HDL-c | 2.0 |
| LDL-c | 7.3 |
| FBG | 1.1 |

VIF = 1/(1-R2). VIF step-by-step screening method: Calculate the VIF of each variable. If the maximum VIF value >10, remove the variable with the maximum VIF value.

**Abbreviations:** BMI, body mass index; SBP, systolic blood pressure; DBP, diastolic blood pressure; TC, total cholesterol; TG, triglyceride; HDL-c, high-density lipoprotein cholesterol; LDL-c, low-density lipoprotein cholesterol; FPG, fasting plasma glucose; ALT, alanine transaminase; AST, aspartate transaminase; GGT, gamma-glutamyl transferase; Cr, creatinine; BUN, blood urea nitrogen; UA, uric acid; CCB, calcium channel blockers; ACEI, angiotensin-converting enzyme inhibitor; ARB, angiotensin receptor blocker; PAC, plasma aldosterone concentration; PA, primary aldosteronism; VIF, variance inflation factors.

##

## 3.2 Supplementary Figure


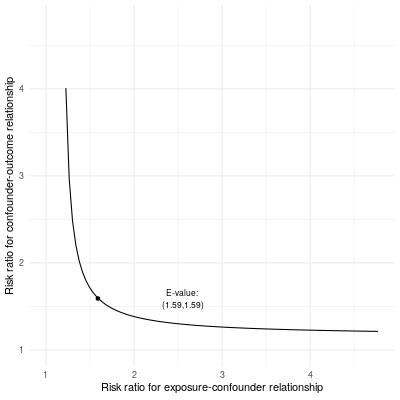


**Figure S1** E-value for the point estimate.

**References**

1. Farrell GC, Chitturi S, Lau GK, Sollano JD, Asia-Pacific Working Party on N Guidelines for the assessment and management of non-alcoholic fatty liver disease in the Asia-Pacific region: executive summary. J Gastroenterol Hepatol. 2007;22:775–7. doi: 10.1111/j.1440-1746.2007.05002.x.
2. Fan JG, Jia JD, Li YM, Wang BY, Lu LG, Shi JP, et al. Guidelines for the diagnosis and management of nonalcoholic fatty liver disease: update 2010. J Dig Dis (2011) 12(1):38–44. 10.1111/j.1751-2980.2010.00476.x. published in Chinese on Chinese Journal of Hepatology 2010; 18:163–166.
